# Supplementary material for: Climate Change Could Increase the Geographic Extent of Hendra Virus Spillover Risk
Source: Springer Nature journal article supplement (doi:10.1007/s10393-018-1322-9), 2018-03-19
Supplement: MOESM1 [file 15545952]

# Supplementary materials

Climate change could increase the extent of areas at risk of  
Hendra virus spillover

## Diagnostic tests of model convergence

### *P. alecto* spillover system model

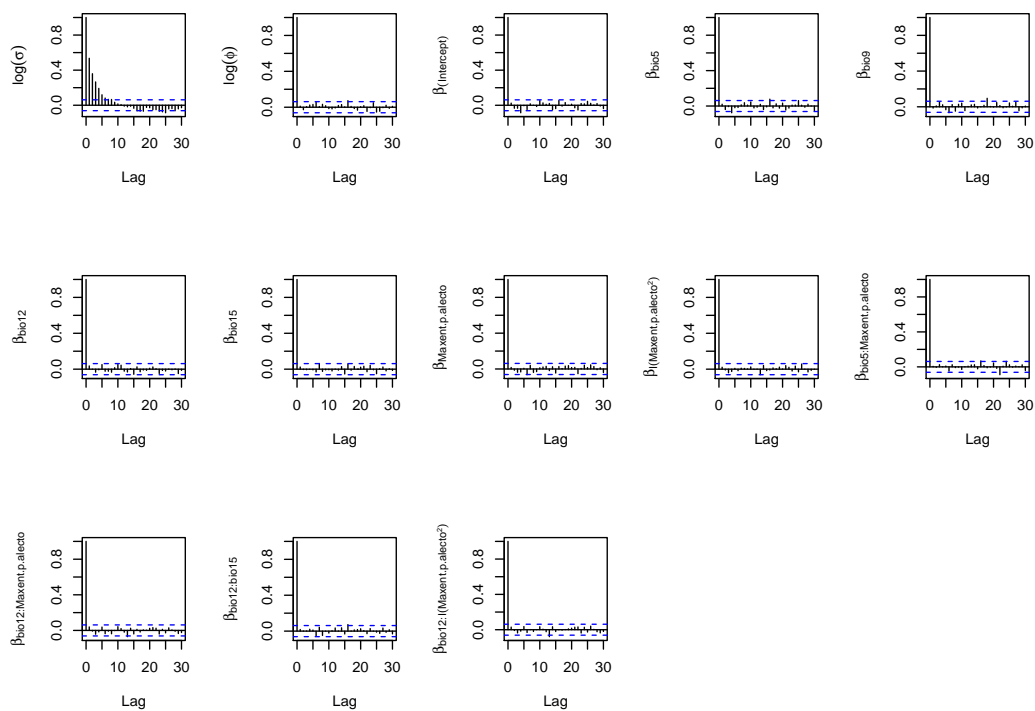

Figure S1. Parameter autocorrelation in the *P. alecto* model.

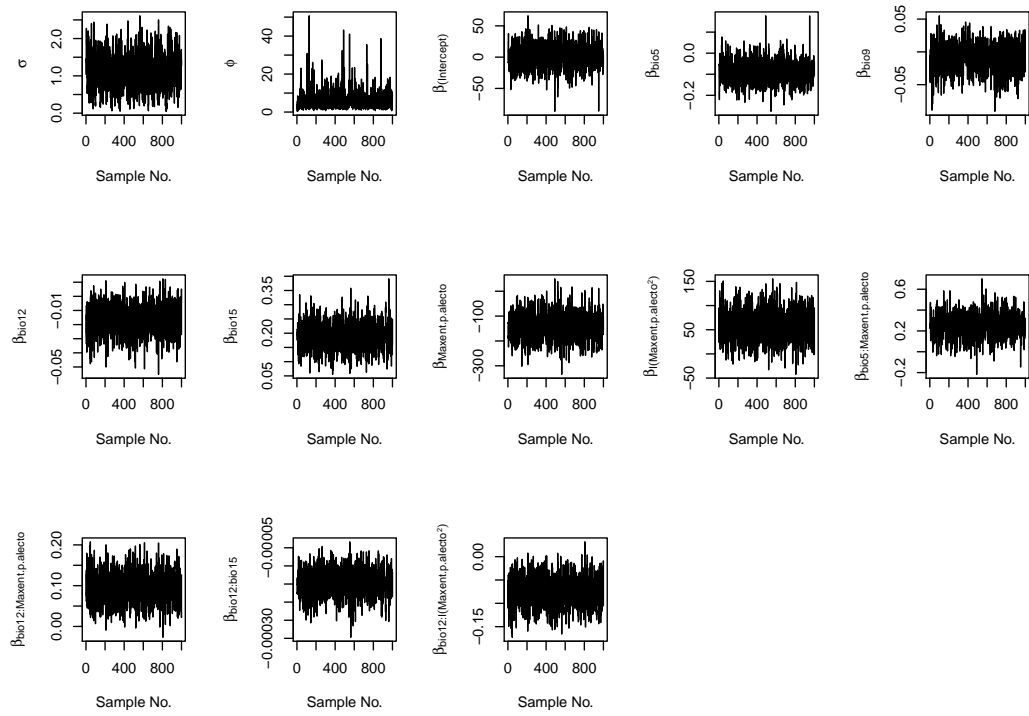

Figure S2. Trace plots of the MCMC chains of the *P. alecto* model.

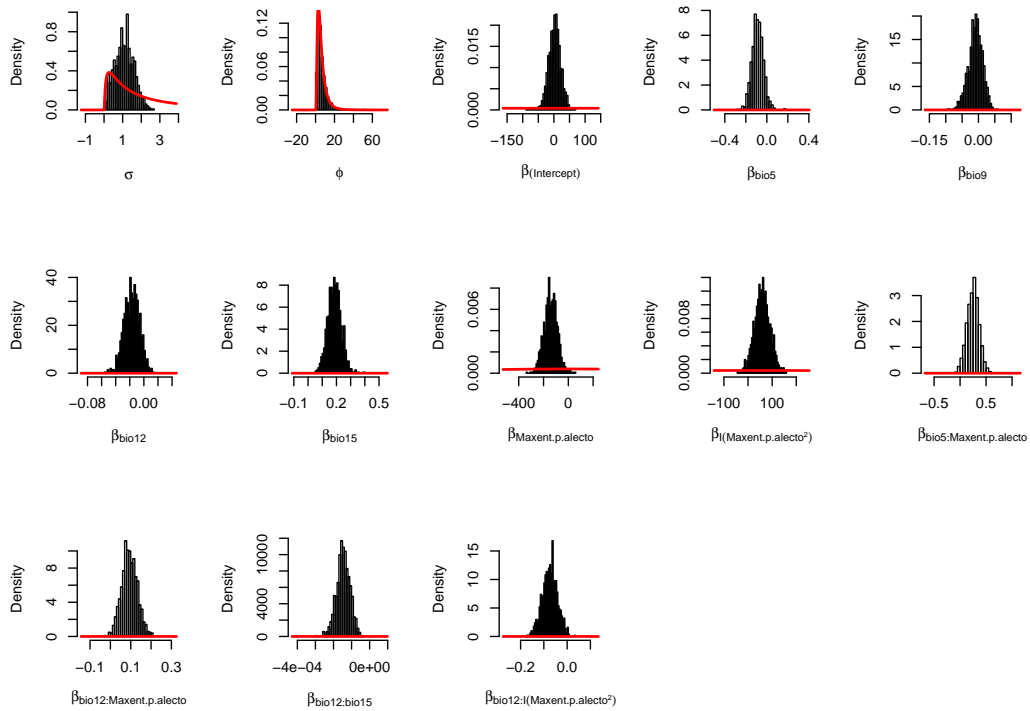

Figure S3. Priors (red density curves) and posterior estimates of the *P. alecto* model.

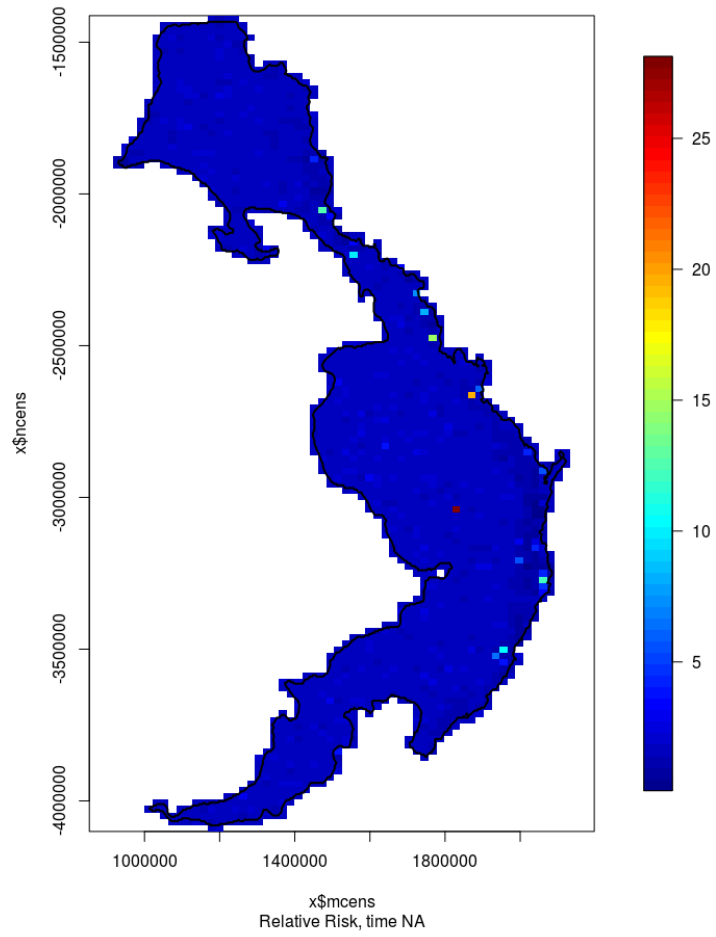

Figure S4. Spatial autocorrelation estimates (random effects) in the *P. alecto* system.

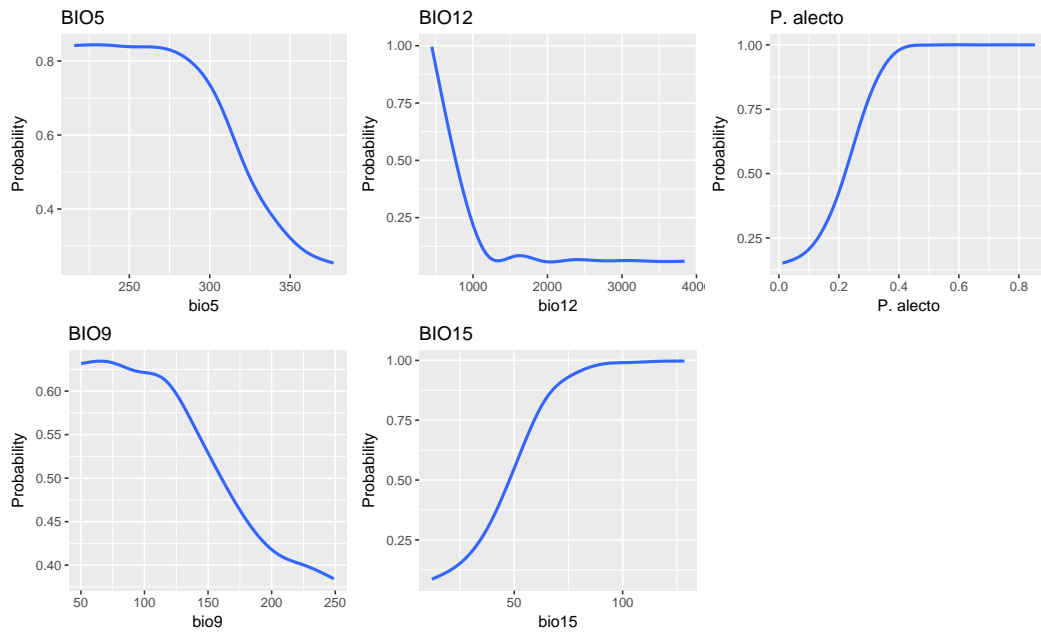

Figure S5. Individual partial responses (exceeding probabilities) in the *P. alecto* model.

## *P. conspicillatus* spillover system model

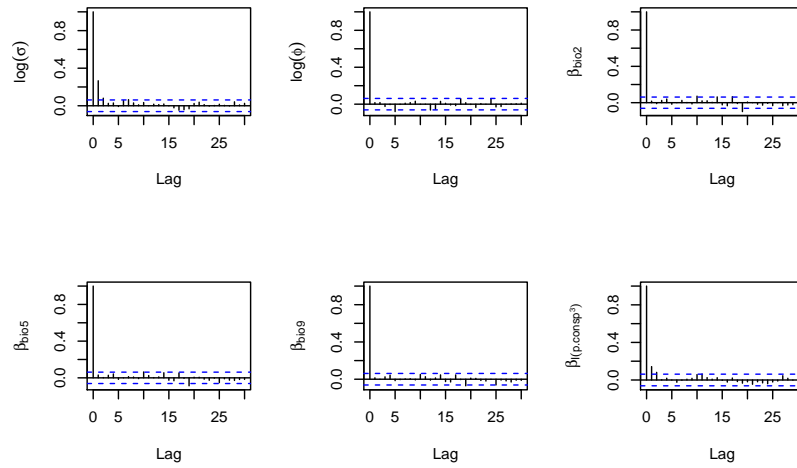

Figure S6. Parameter autocorrelation in the *P. conspicillatus* model.

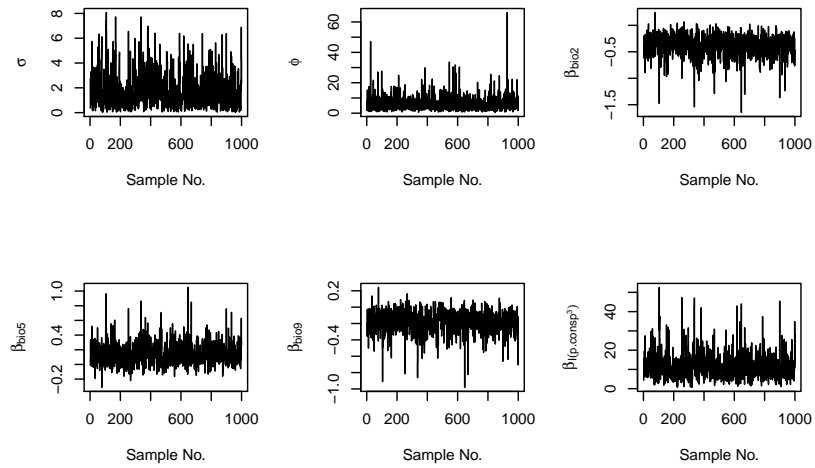

Figure S7. Trace plots of the MCMC chains of the *P. conspicillatus* model.

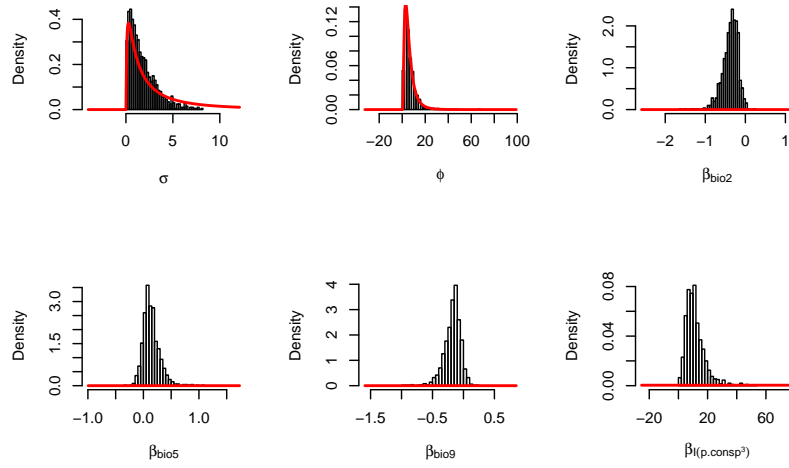

Figure S8. Priors (red density curves) and posterior estimates of the *P. conspicillatus* model.

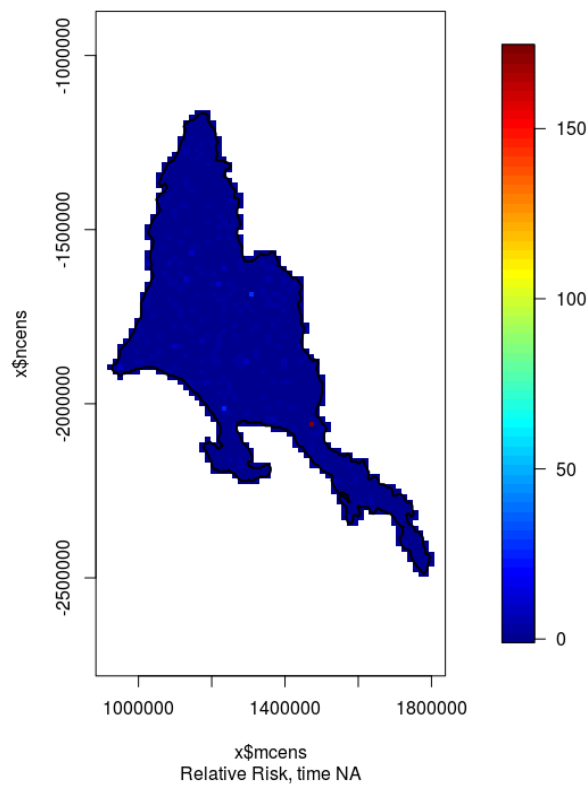

Figure S9. Risk function fitted for the *P. conspicillatus* model.

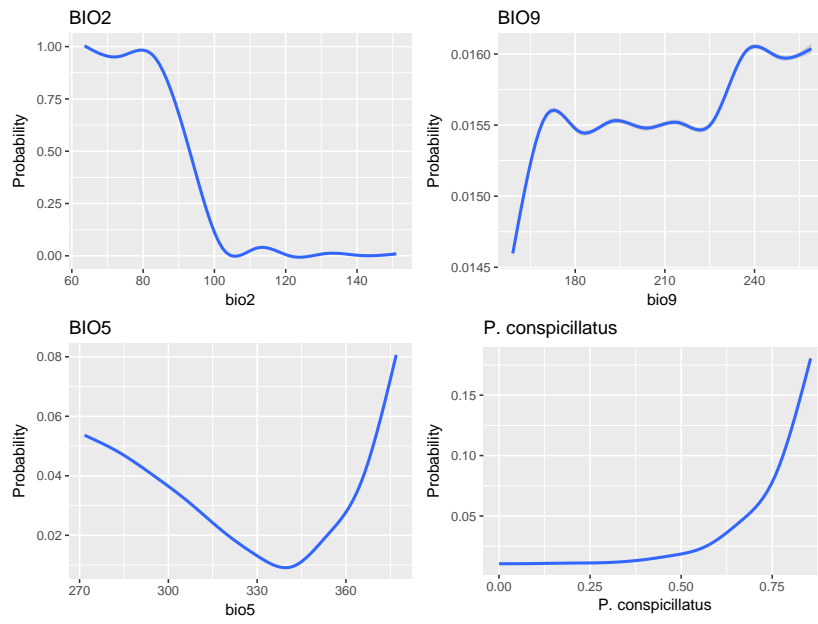

Figure S10. Individual partial responses (exceeding probabilities) in the *P. conspicillatus* model.
